# Supplementary material for: 2α-Hydroxyeudesma-4,11(13)-Dien-8β,12-Olide Isolated from Inula britannica Induces Apoptosis in Diffuse Large B-cell Lymphoma Cells
Source: Biomolecules. 2020 Feb 18;10(2):324. doi: 10.3390/biom10020324 (PMC7072307; doi:10.3390/biom10020324)
Supplement: Supplementary file 1 [file biomolecules-10-00324-s001.pdf]

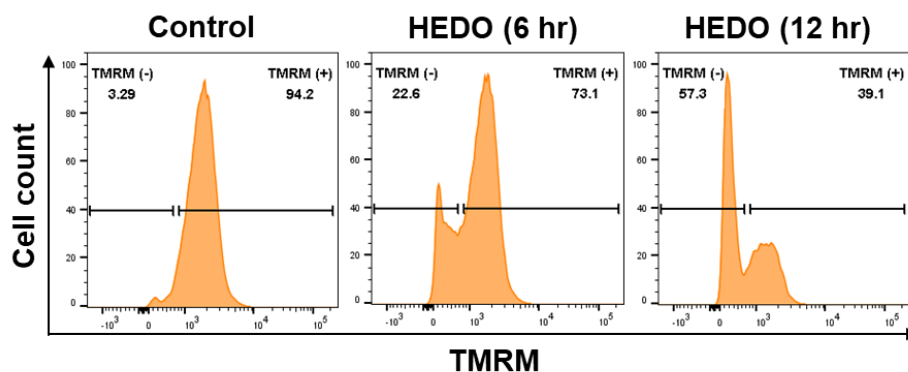

**Figure S1.** HEDO reduced the mitochondrial membrane potential within a short time in OCI-LY3 cells. Mitochondrial membrane potential of OCI-LY3 cells after 6 and 12 hours loaded with TMRM (100 nM), as detected by flow cytometry.

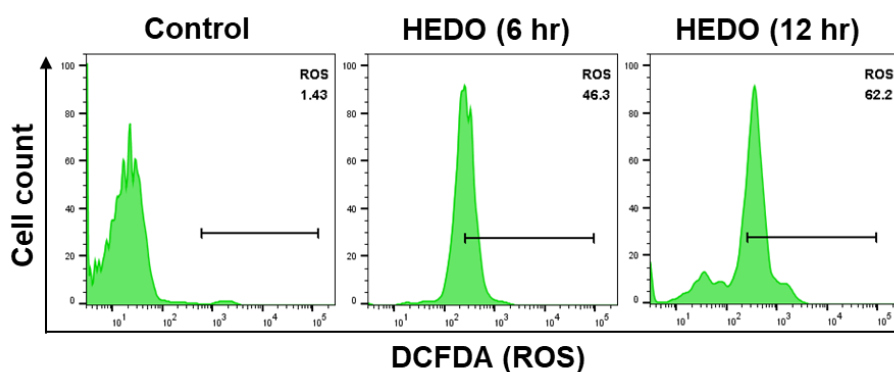

**Figure S2.** HEDO induced intracellular ROS levels within a short time in OCI-LY3 cells. Measurements of ROS levels in HEDO-treated OCI-LY3 cells after 6 and 12 hours, as detected by flow cytometry with DCFDA (1  $\mu$ M).

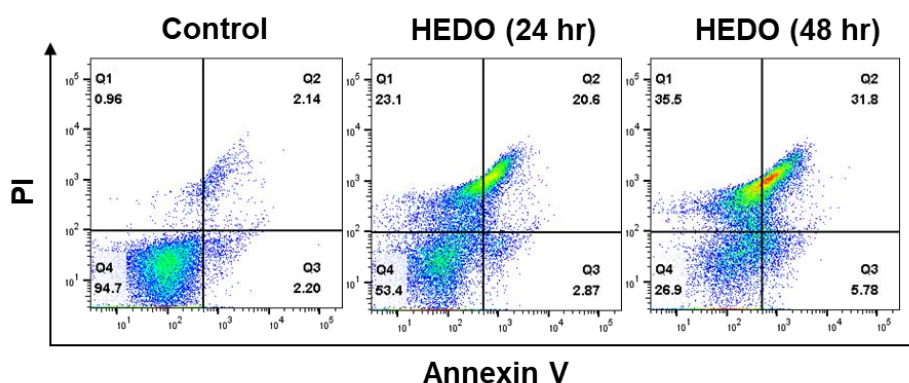

**Figure S3.** HEDO-induced apoptosis after 24 hr and 48 hr in OCI-LY3 cells. OCI-LY3 cells were untreated or treated with HEDO for 24 and 48 hours. Afterwards, apoptosis evaluation was performed via Annexin V-APC/PI double staining and flow cytometry.

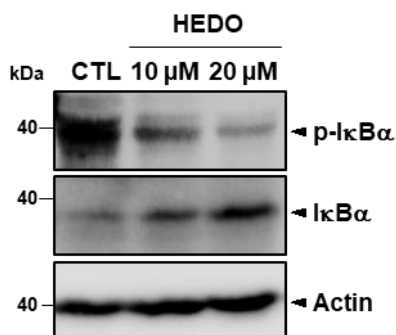

**Figure S4.** Effects of HEDO on NF-κB signaling in OCI-LY3 cells. Whole cell lysates were used to determine the expression levels of phosphorylated-I kappa B alpha (p-IκBα) and IκBα after treating the cells with HEDO.

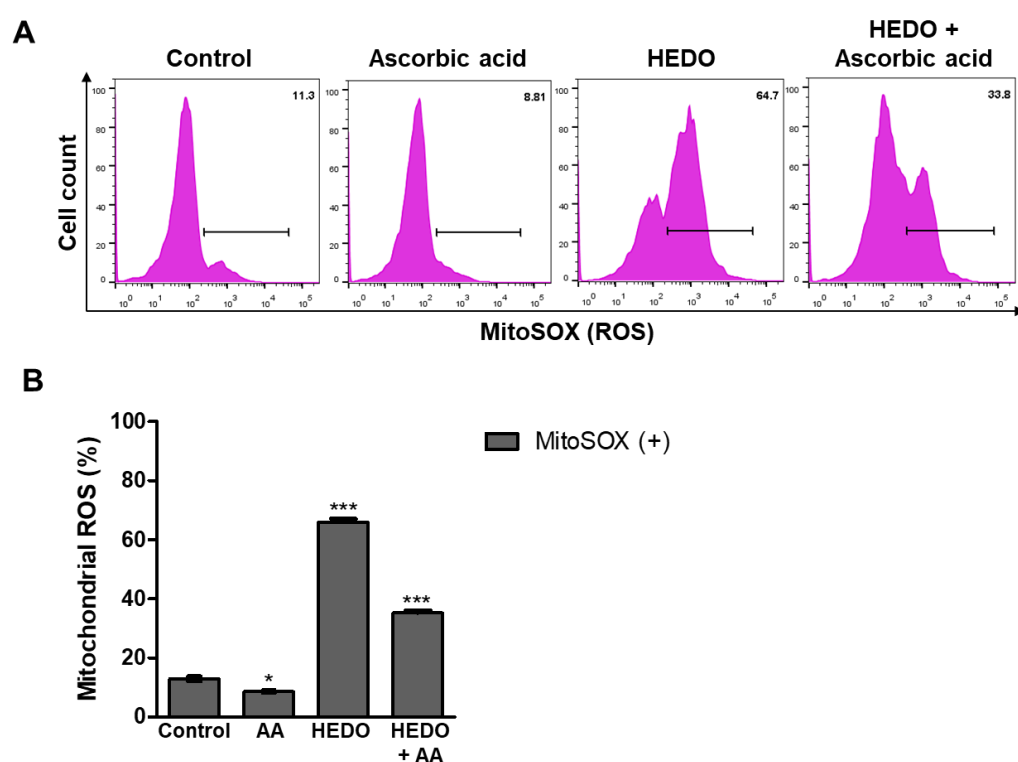

**Figure S5.** HEDO induced mitochondrial ROS levels in OCI-LY3 cells. (A) Measurements of mitochondrial ROS levels in HEDO-treated OCI-LY3 cells after 24 hours, as detected by flow cytometry with MitoSOX (5 μM). (B) Quantified mitochondrial ROS levels. Values indicate the means ± SEM. (n = 3, \* P < 0.05, \*\*\* p ≤ 0.001).

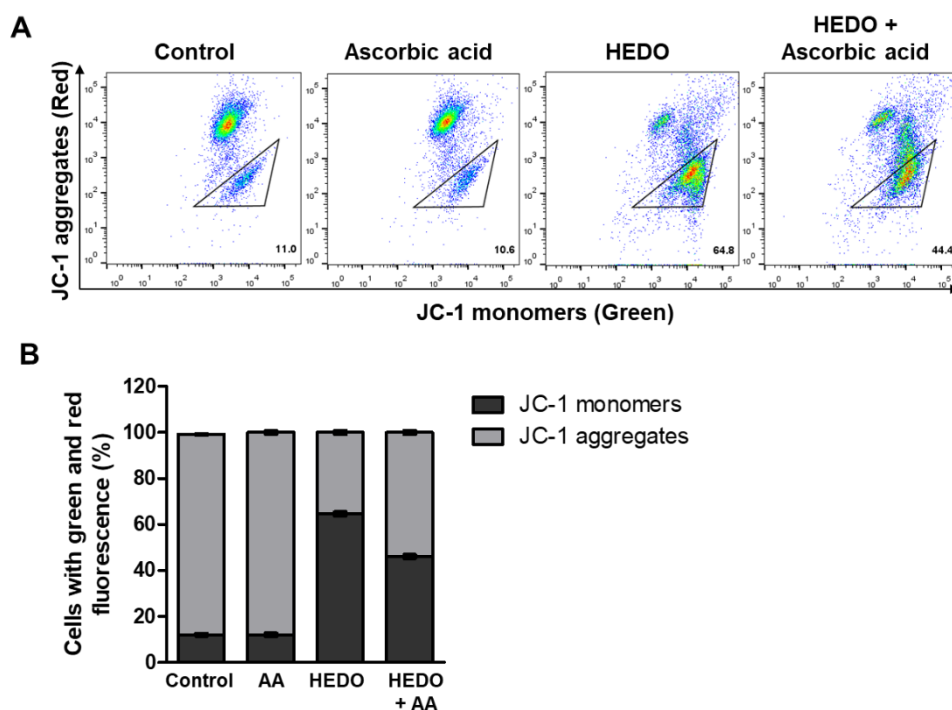

**Figure S6.** Mitochondrial membrane potential changes induced by HEDO in OCI-LY3 cells. (A) Measurements of mitochondrial membrane potential in HEDO-treated OCI-LY3 cells after 24 hours, as detected by flow cytometry with JC-1 (2  $\mu$ M). (B) Quantified mitochondrial ROS levels.

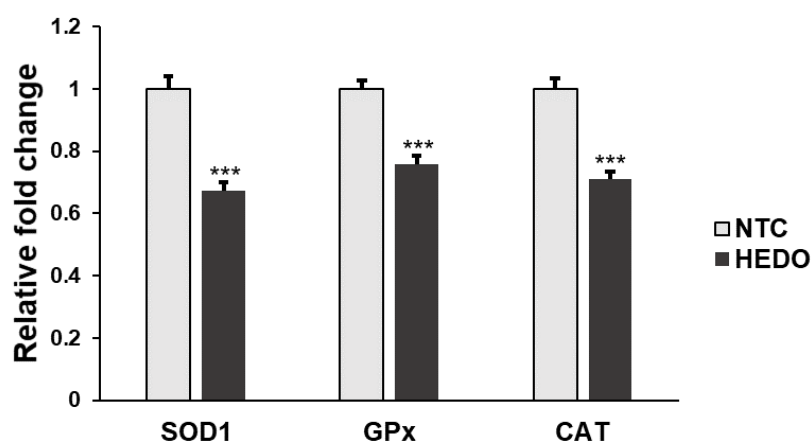

**Figure S7.** Effect of HEDO on the mRNA expression levels of involved antioxidants in OCI-LY3 cells. The qRT-PCR analysis results of the mRNA levels of SOD1, GPx, and CAT in the control and the HEDO (10  $\mu$ M)-treated OCI-LY3 cells (n = 3, \*\*\* p  $\leq$  0.001) were compared.
